# Supplementary material for: Emergence and Persistent Circulation of Highly Pathogenic Avian Influenza Virus A (H5N8) in Kosovo, May 2021–May 2022
Source: MDPI journal article supplement (doi:10.3390/microorganisms11092226), 2023-09-02
Supplement: s1 [file s1]

**Table S1.** Primer/probe sequences used in the initial screening of the suspected outbreaks in the Kosovo Food and Veterinary Laboratory

| Assay                                        | Oligo name         | Sequence (5' to 3')                                    | Final conc.( $\mu$ M)<br>in 25 $\mu$ l of final<br>volume |
|----------------------------------------------|--------------------|--------------------------------------------------------|-----------------------------------------------------------|
| AI type A (Heine, et al., 2015)              | Forw IVA D161M     | AGA TGA GYC TTC TAA CCG AGG TCG                        | 0.9                                                       |
|                                              | Rev IVA D162M1     | TGC AAA AAC ATC YTC AAG TCT CTG                        | 0.225                                                     |
|                                              | Rev IVA D162M2     | TGC AAA CAC ATC YTC AAG TCT CTG                        | 0.225                                                     |
|                                              | Rev IVA D162M3     | TGC AAA GAC ATC YTC AAG TCT CTG                        | 0.225                                                     |
|                                              | Rev IVA D162M4     | TGC AAA TAC ATC YTC AAG TCT CTG                        | 0.225                                                     |
|                                              | Probe IVA MA       | FAM-TCA GGC CCC CTC AAA GCC GA-TAMRA                   | 0.25                                                      |
| Eurasian H5 (Slomka et al., 2007)            | Forw H5LH1         | ACA TAT GAC TAC CCA CAR TAT TCA G                      | 0.4                                                       |
|                                              | Rev H5RH1          | AGA CCA GCT AYC ATG ATT GC                             | 0.4                                                       |
|                                              | Probe H5PRO        | FAM- TCW ACA GTG GCG AGT TCC CTA GCA-TAMRA             | 0.3                                                       |
| Eurasian H7 (Van Borm et al., 2010 modified) | Forw FeurH7        | GYA GYG GYT ACA AAG ATG TG                             | 0.9                                                       |
|                                              | Rev ReurH7         | GAA GAC AAG GCC CAT TGC AA                             | 0.9                                                       |
|                                              | Probe IAV-HA7-CODA | FAM-TGG TTT AGC TTC GGG GCA TCA TG-BHQ1                | 0.2                                                       |
|                                              |                    |                                                        |                                                           |
| N1 (Payungporn, et al., 2006)                | For N1F2           | GTT TGA GTC TGT TGC TTG GTC                            | 0.4                                                       |
|                                              | Rev N1R1           | TGA TAG TGT CTG TTA TTA TGC C                          | 0.4                                                       |
|                                              | Probe N1           | VIC-TTG TAT TTC AAT ACA GCC AC-(MGB)                   | 0.2                                                       |
| N8 (James, et al., 2019)                     | For N8             | YCC CTG YTT TTG GGT CGA AAT GAT                        | 0.8                                                       |
|                                              | Rev N8             | GCT CCA TCG TGC CAT GAC CA                             | 0.8                                                       |
|                                              | Probe N8           | FAM – TCT AGT AGC TCC ATT GTA ATG TGT GGA GT –<br>BHQ1 | 0.4                                                       |
