# Supplementary figures and images for: Emergence and Persistent Circulation of Highly Pathogenic Avian Influenza Virus A (H5N8) in Kosovo, May 2021–May 2022
Source: MDPI journal article supplement (doi:10.3390/microorganisms11092226), 2023-09-02

## M gene

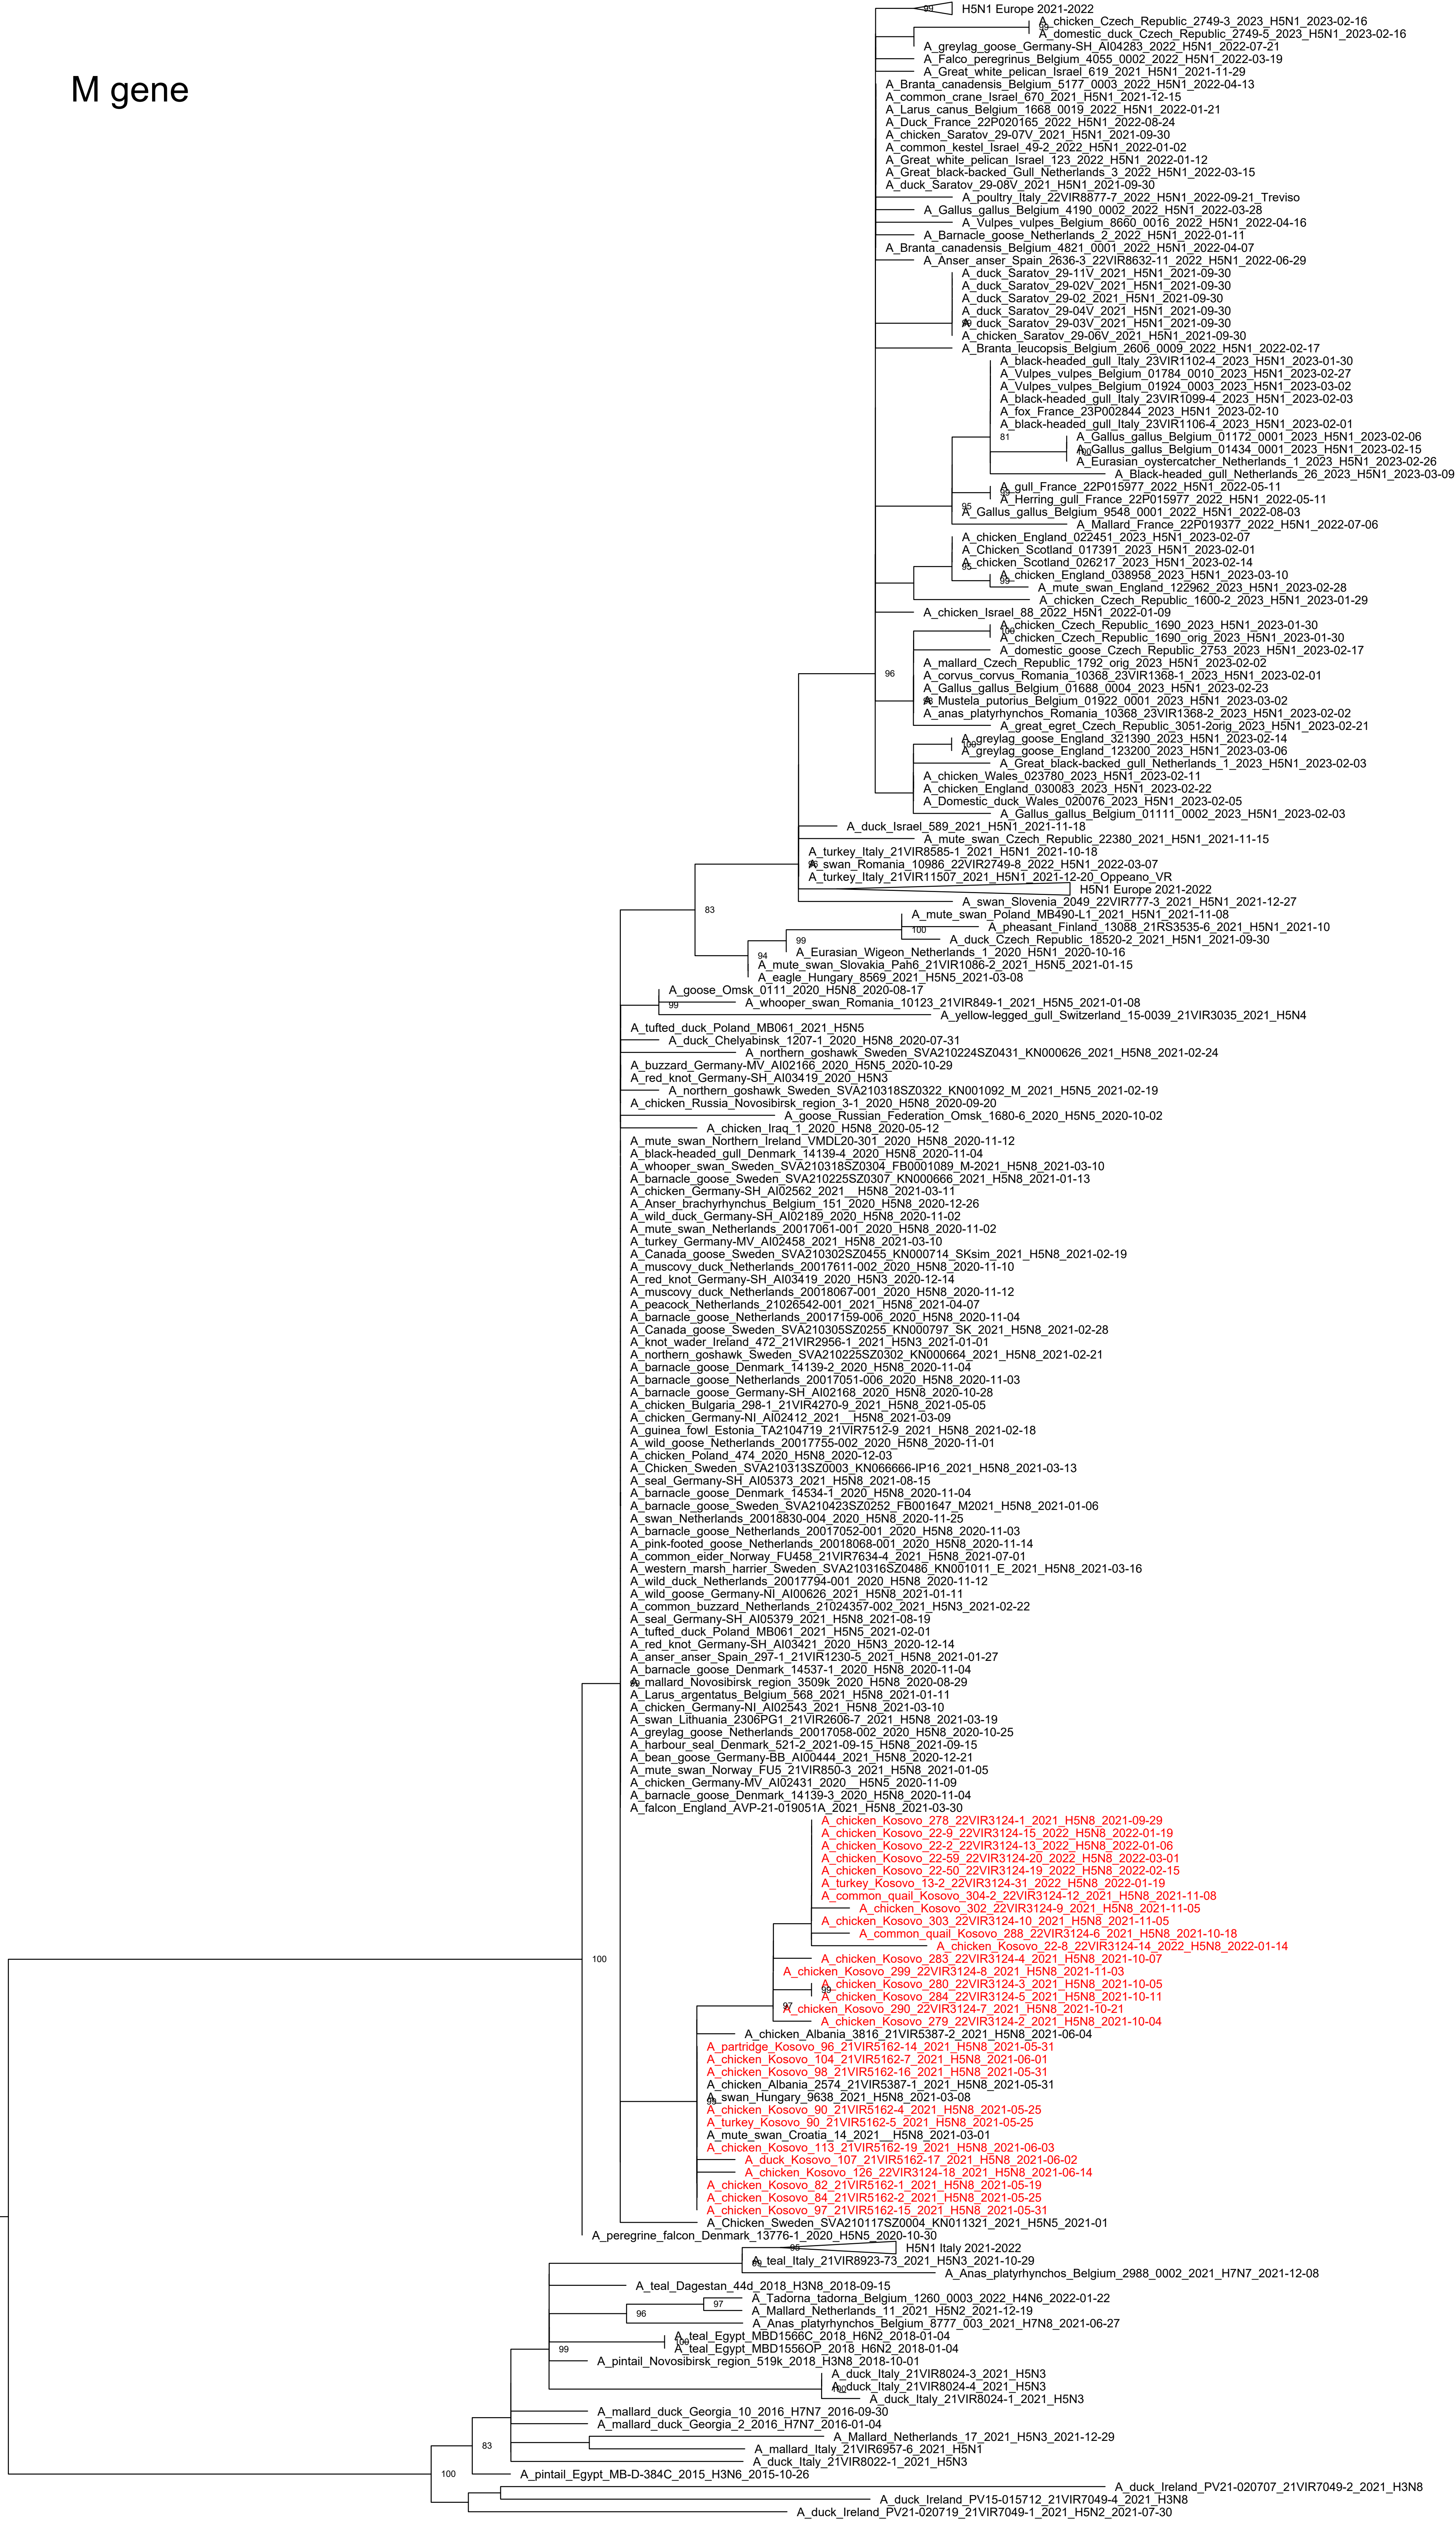

0.003

Supplement: s1 [file s1]

PB2 gene

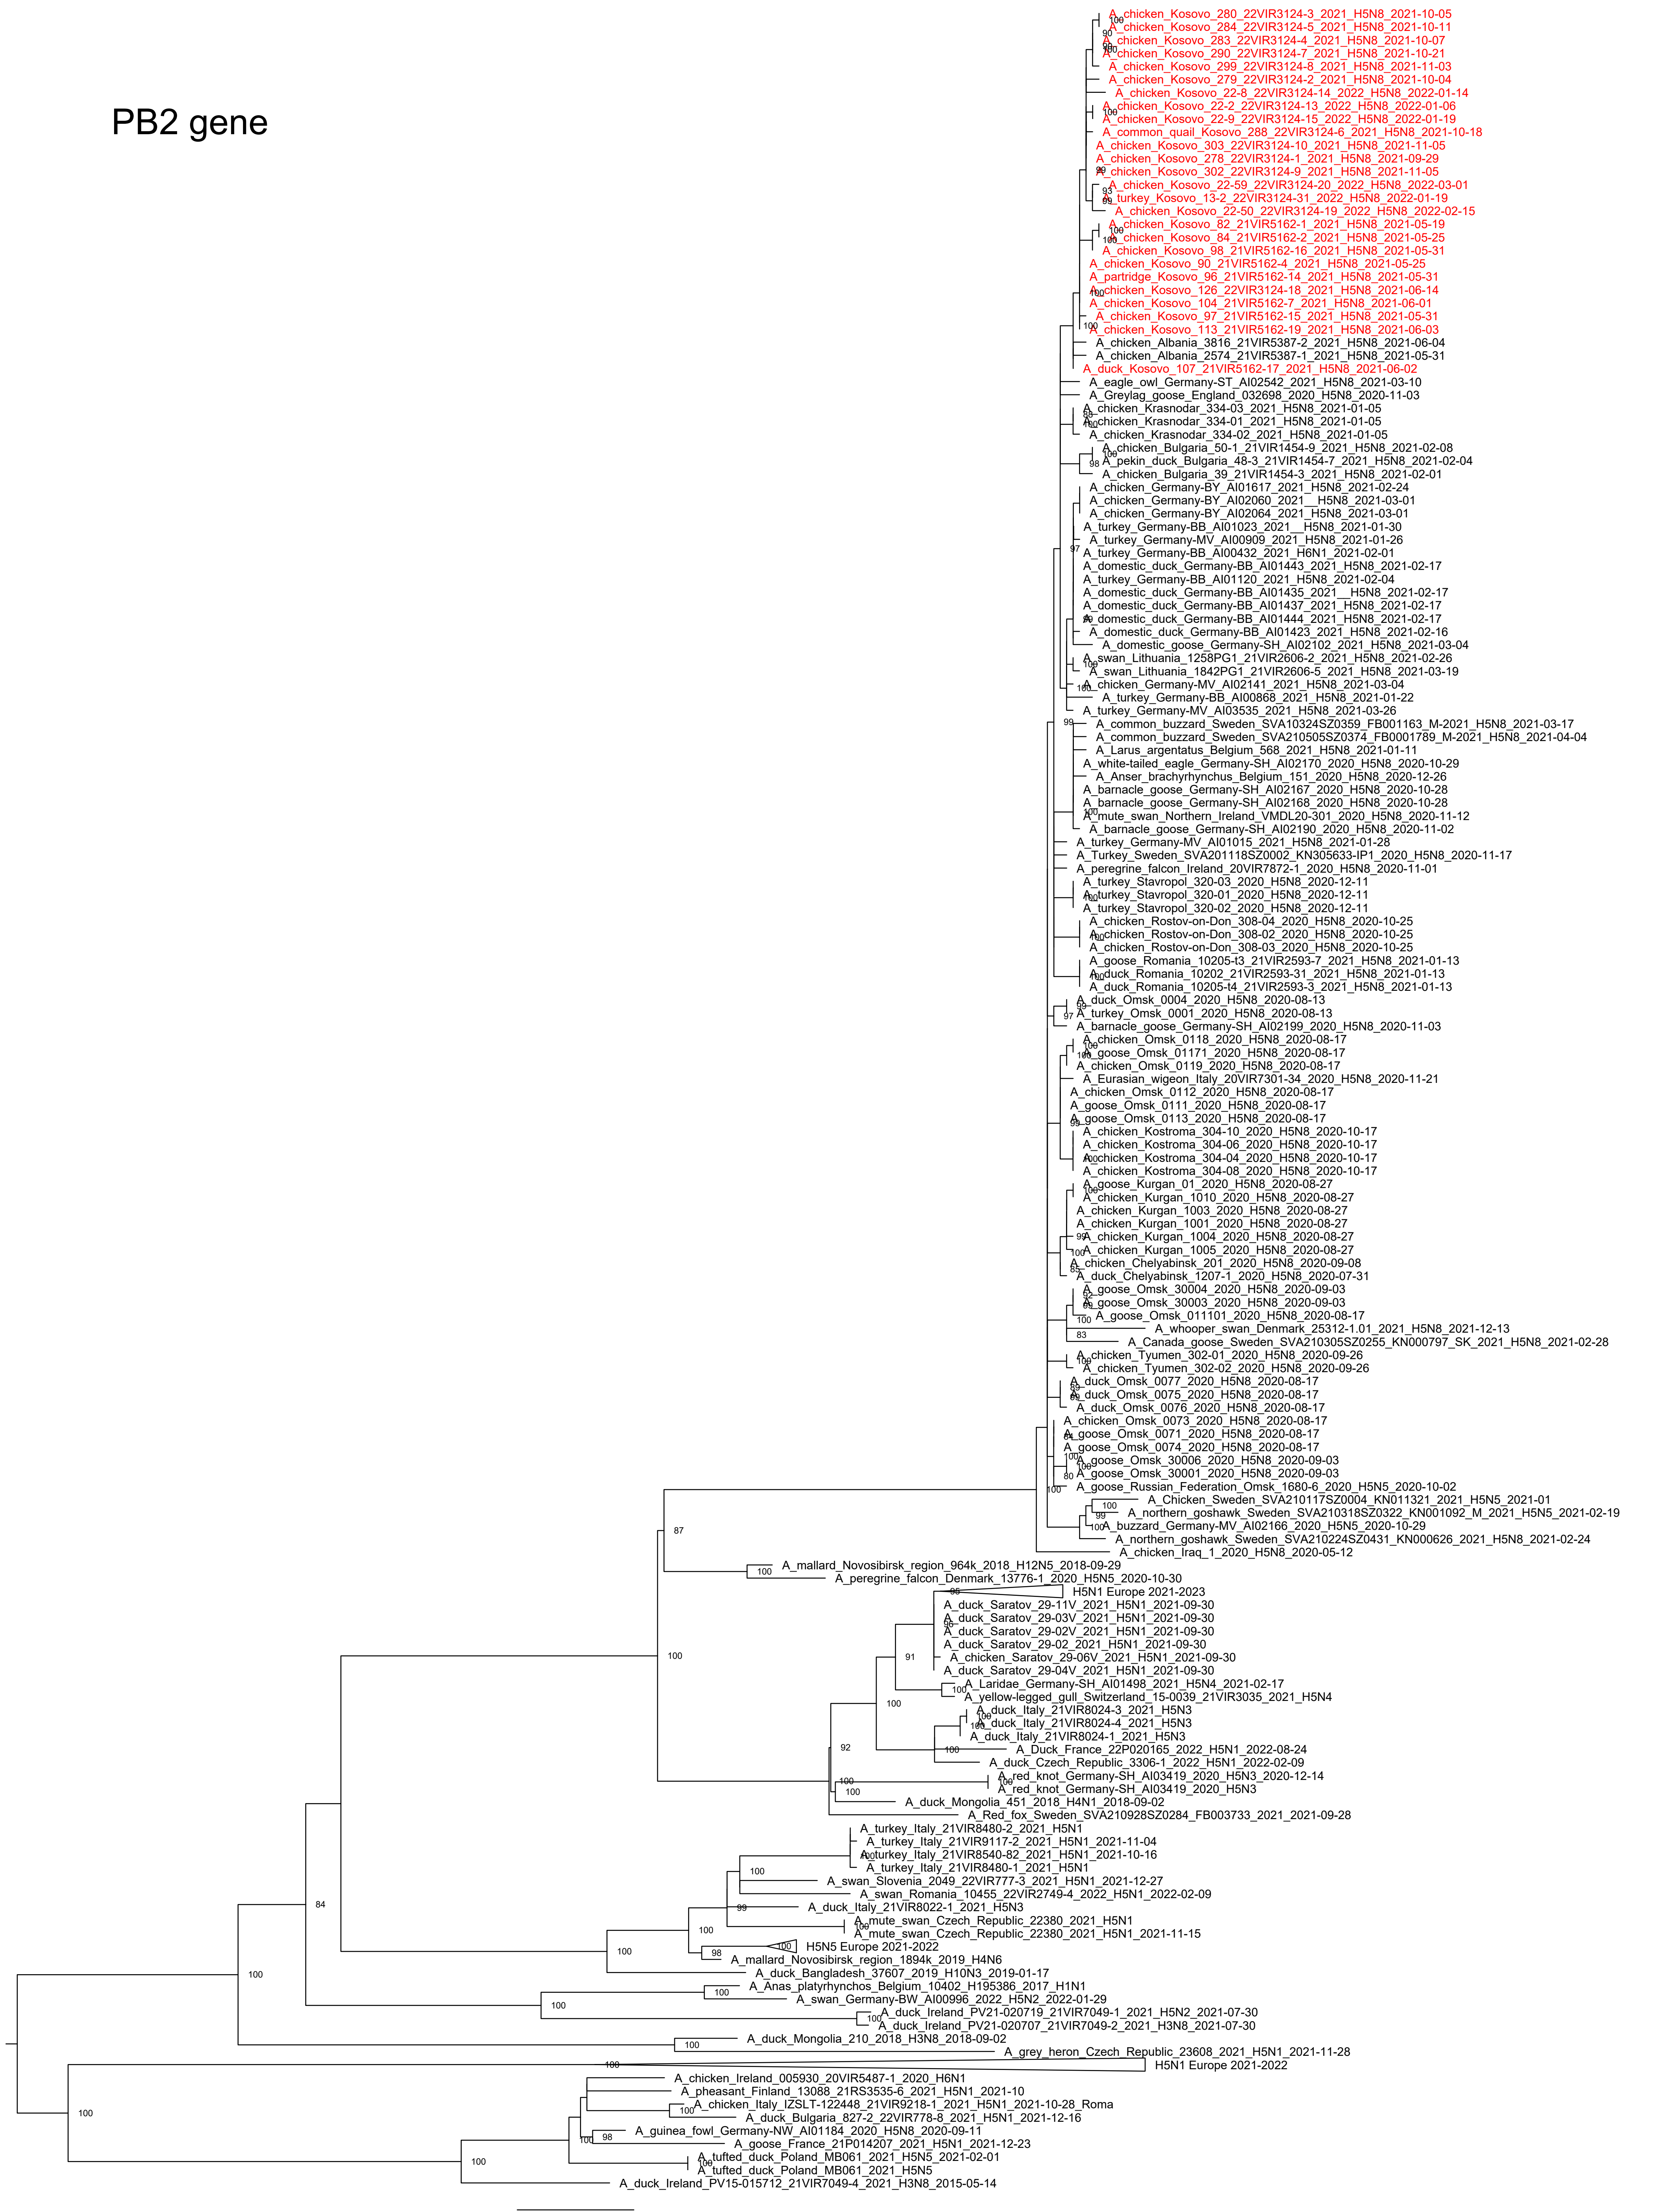

Supplement: s1 [file s1]

PA gene

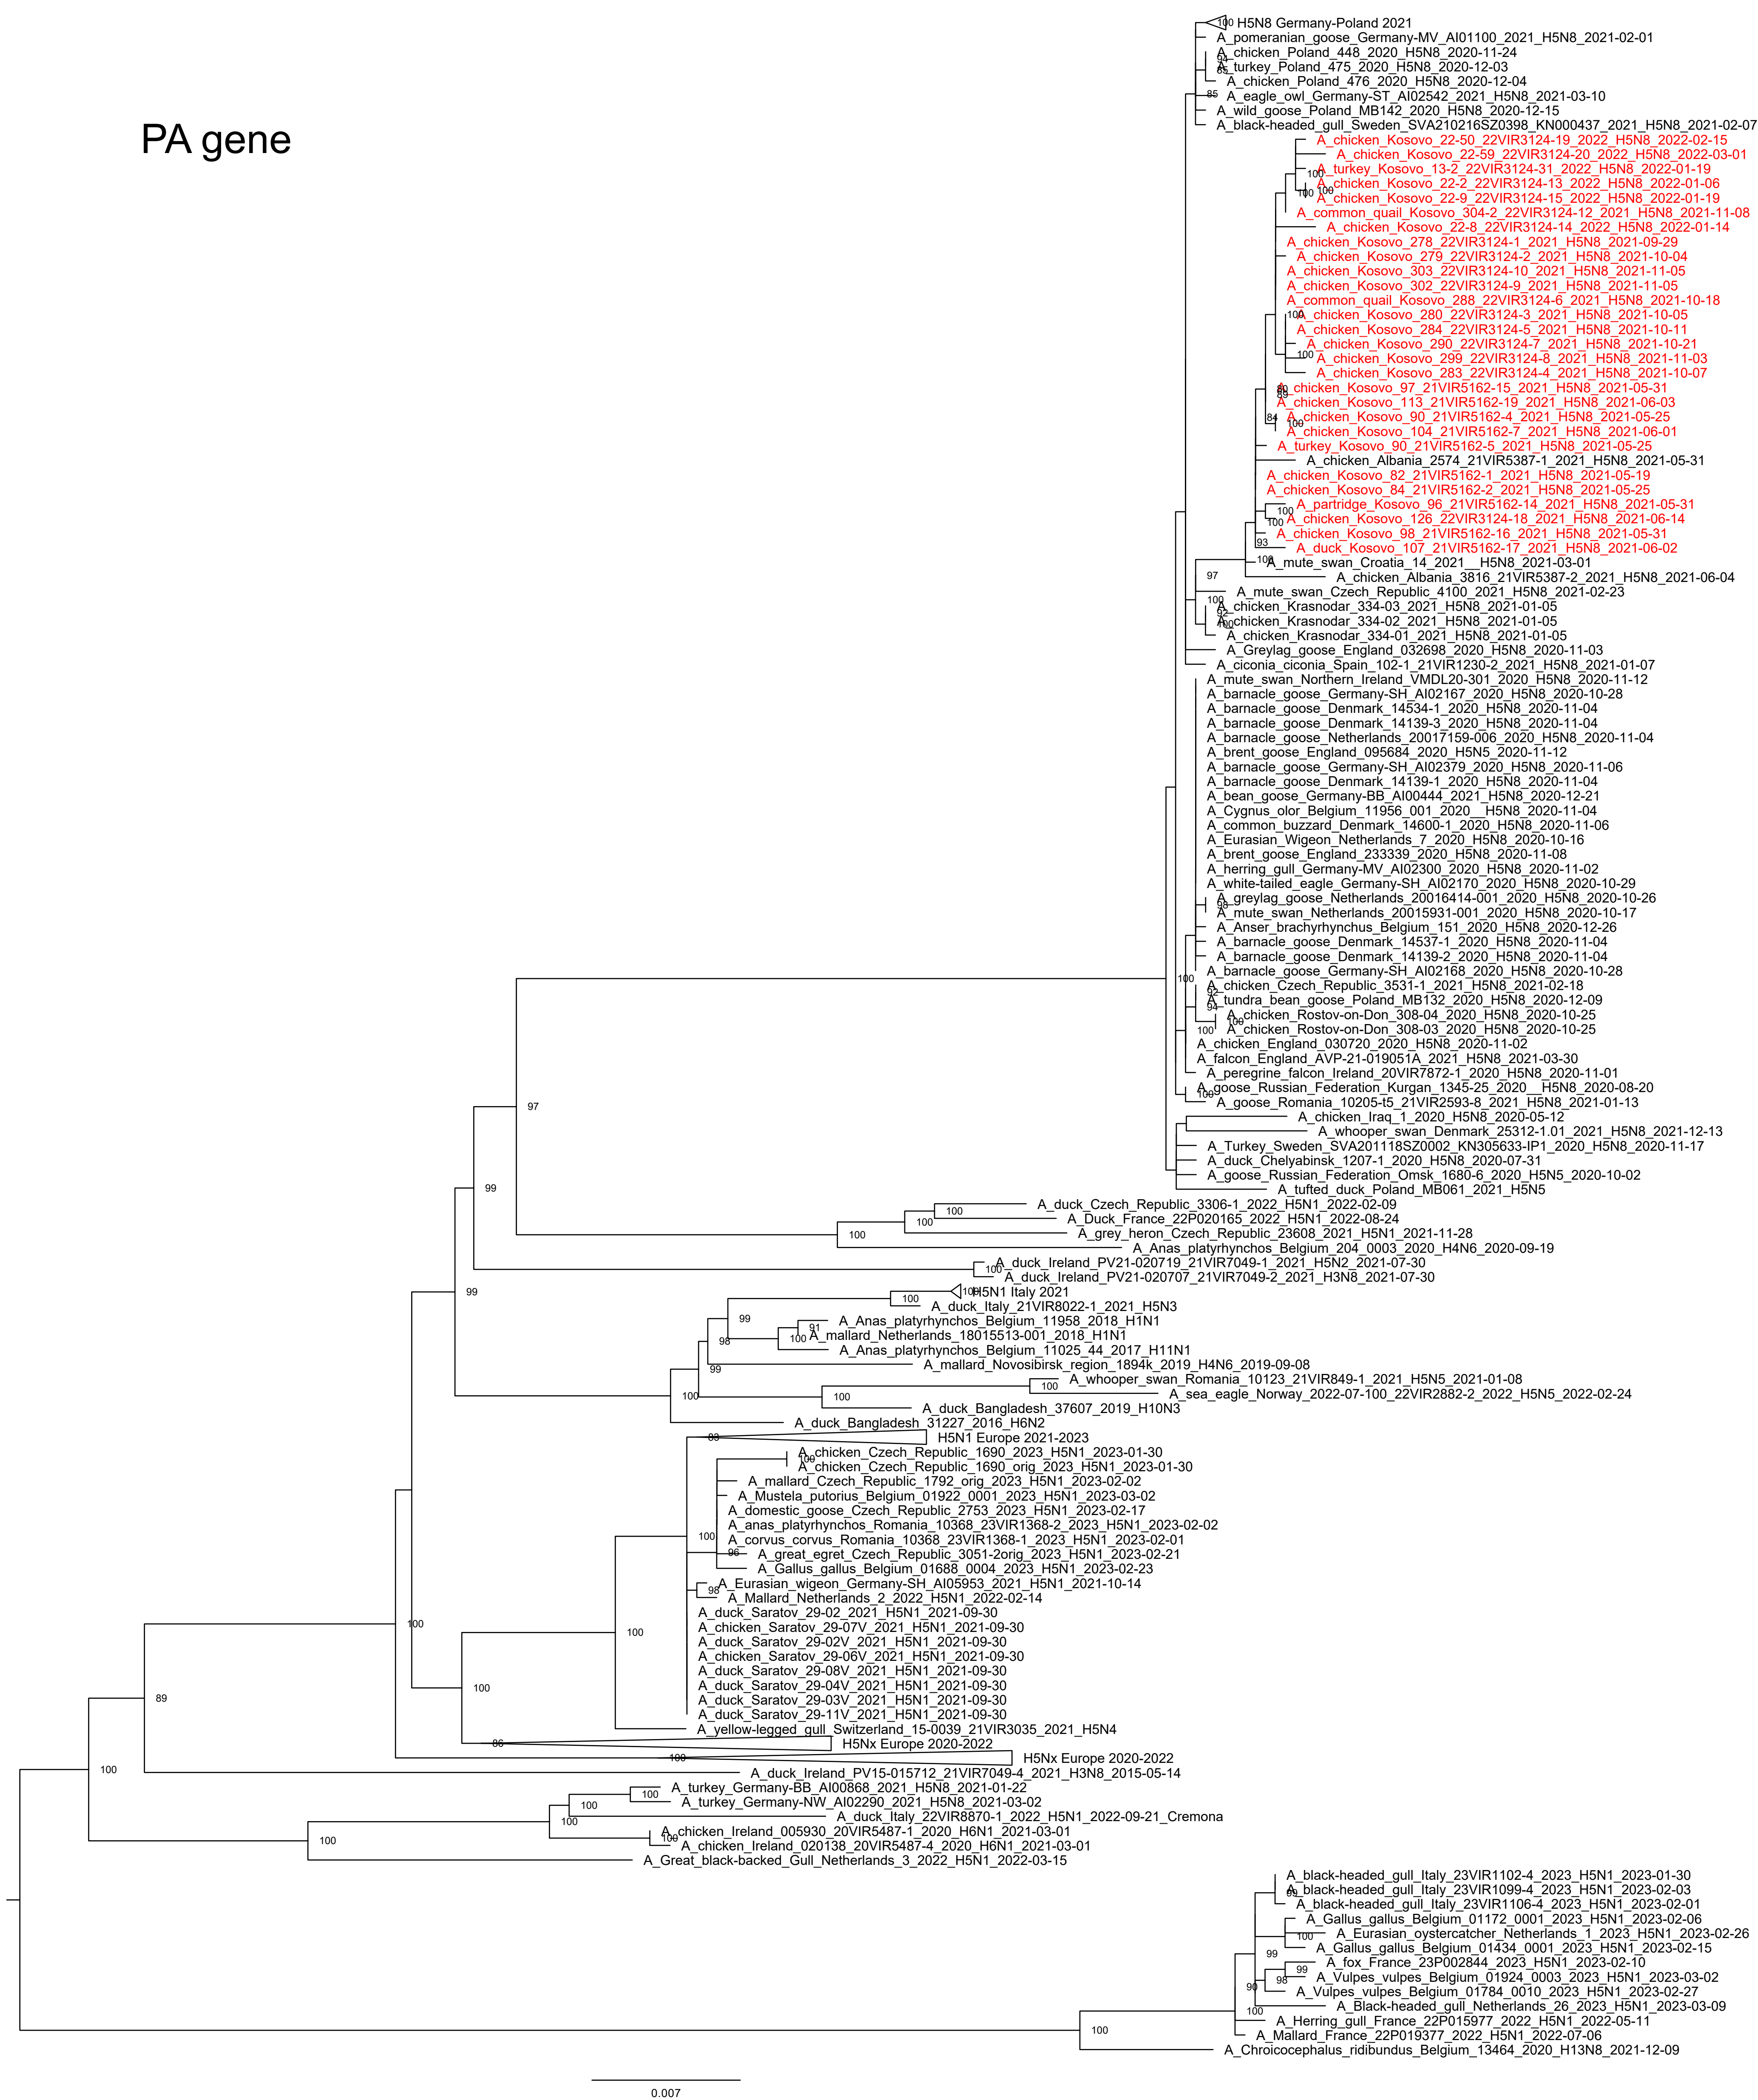

Supplement: s1 [file s1]

NS gene

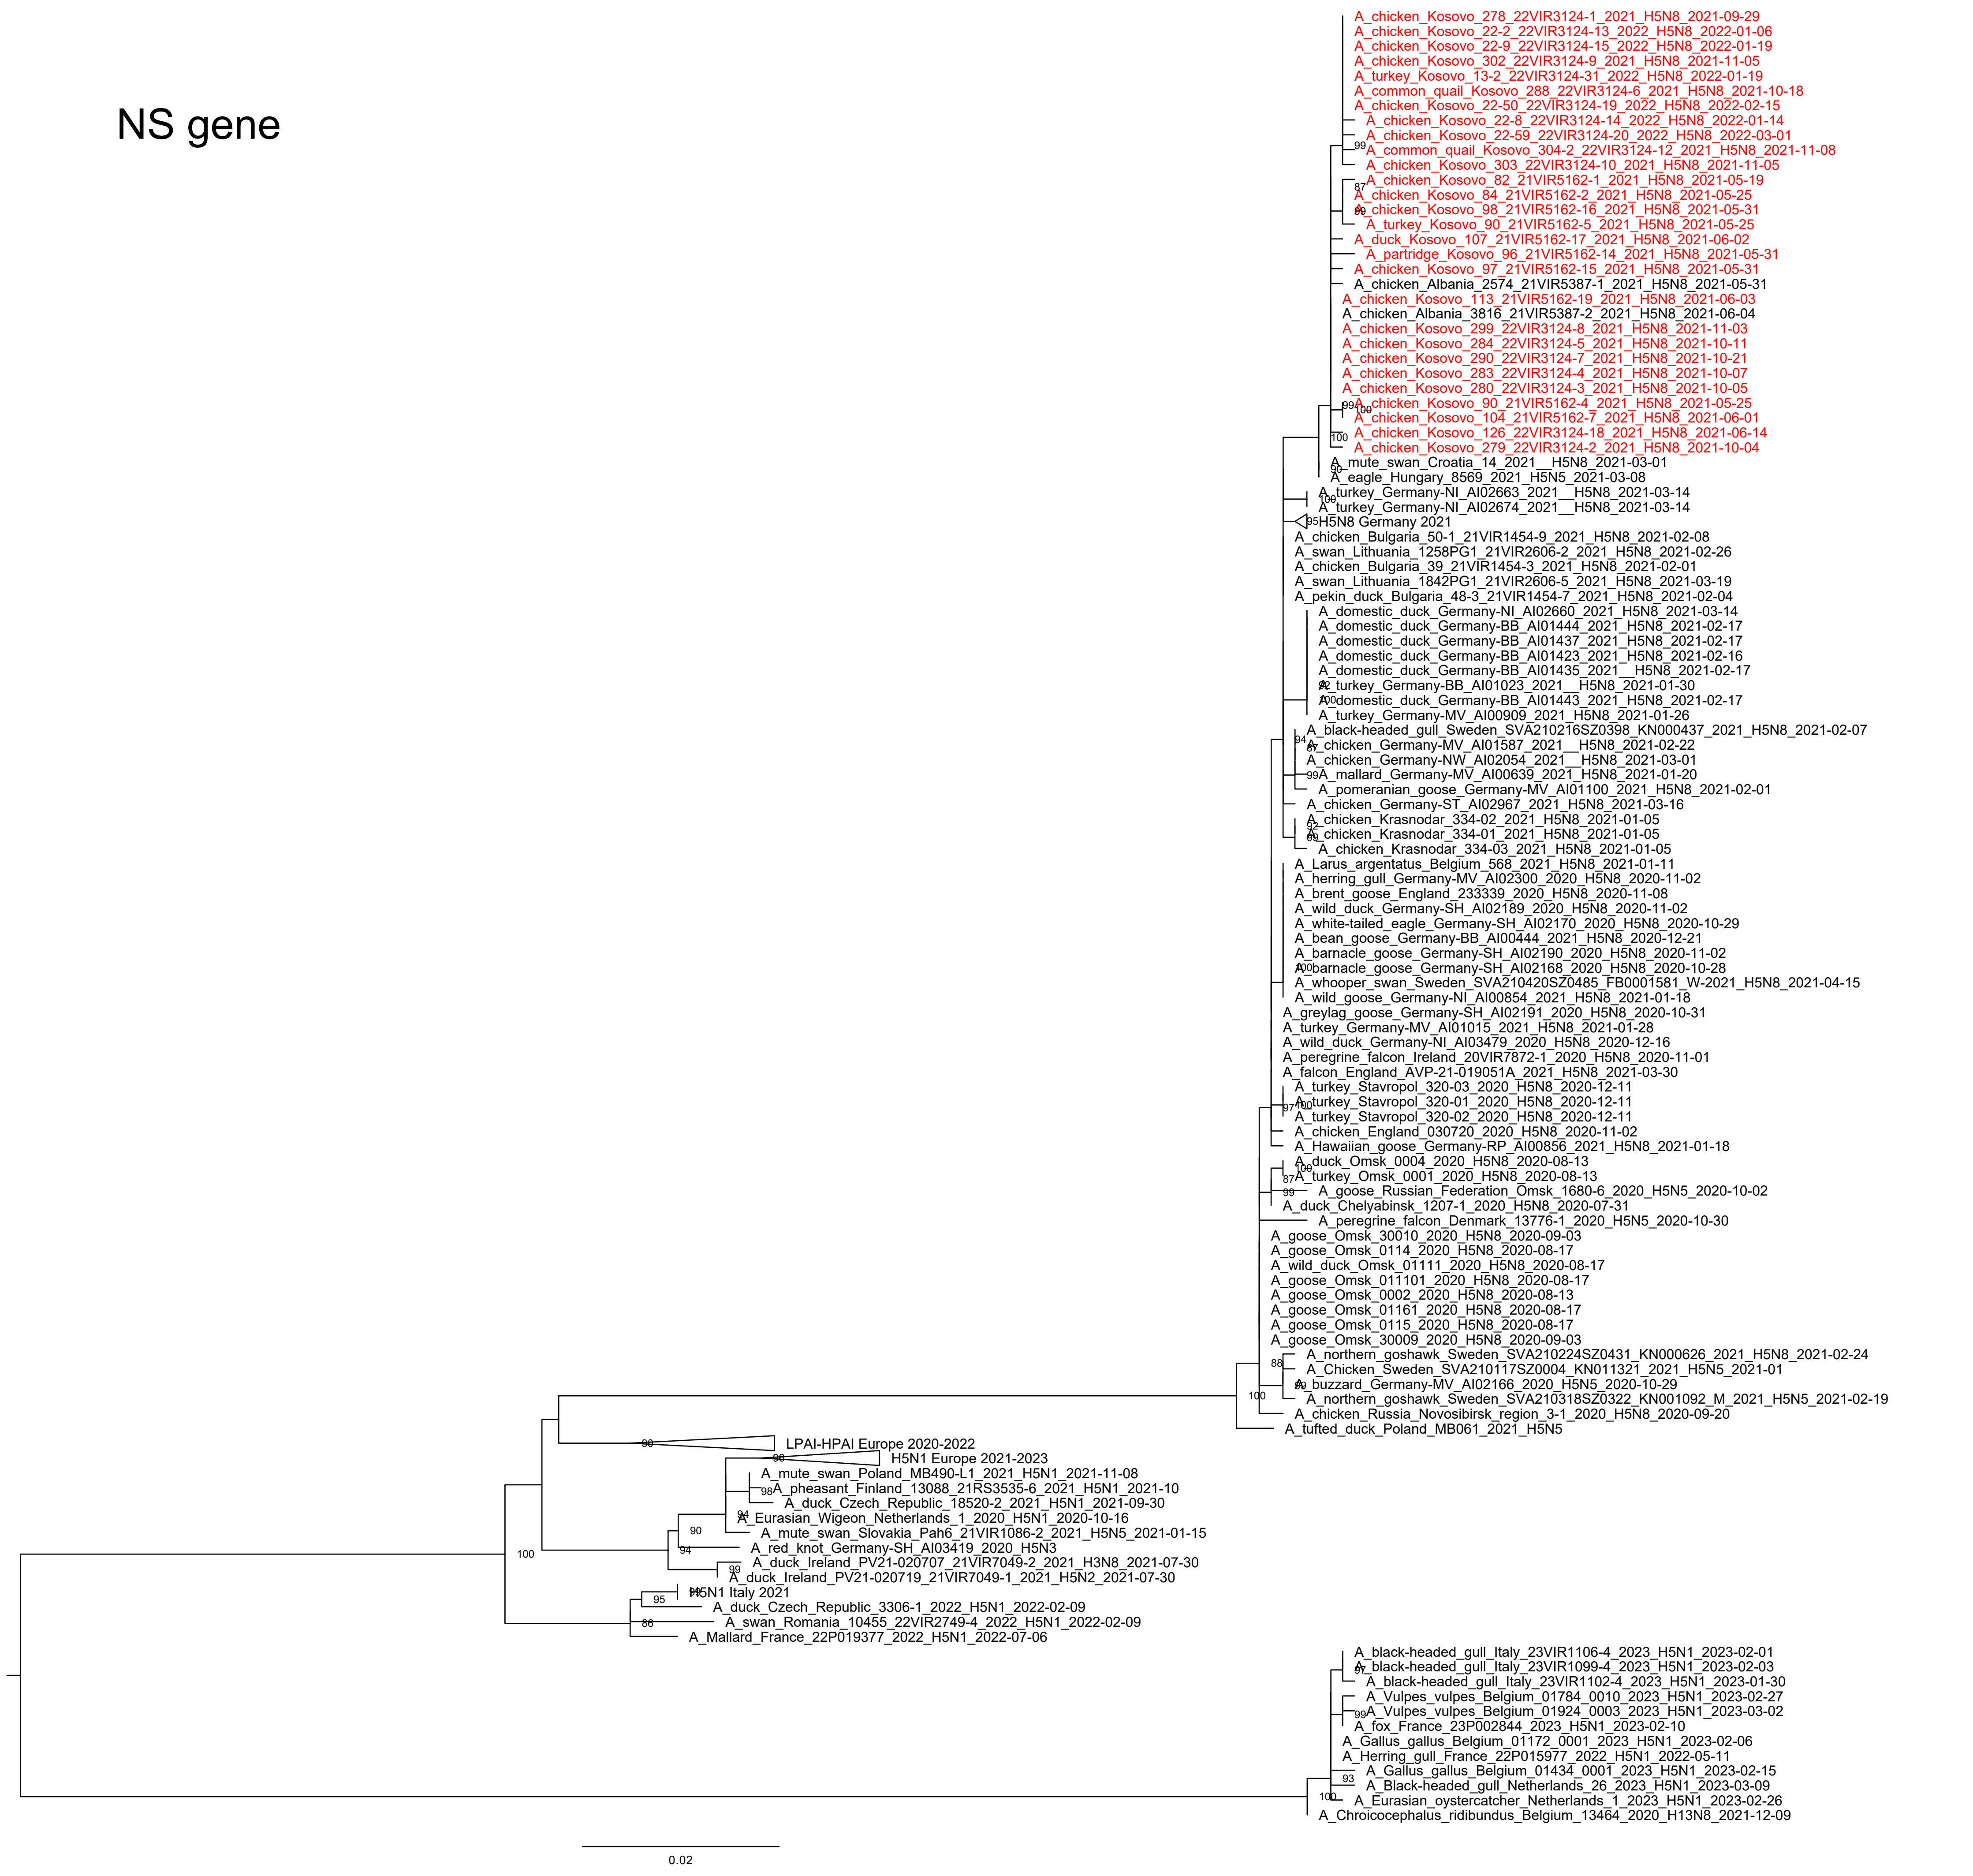

Supplement: s1 [file s1]

NA gene - N8 subtype

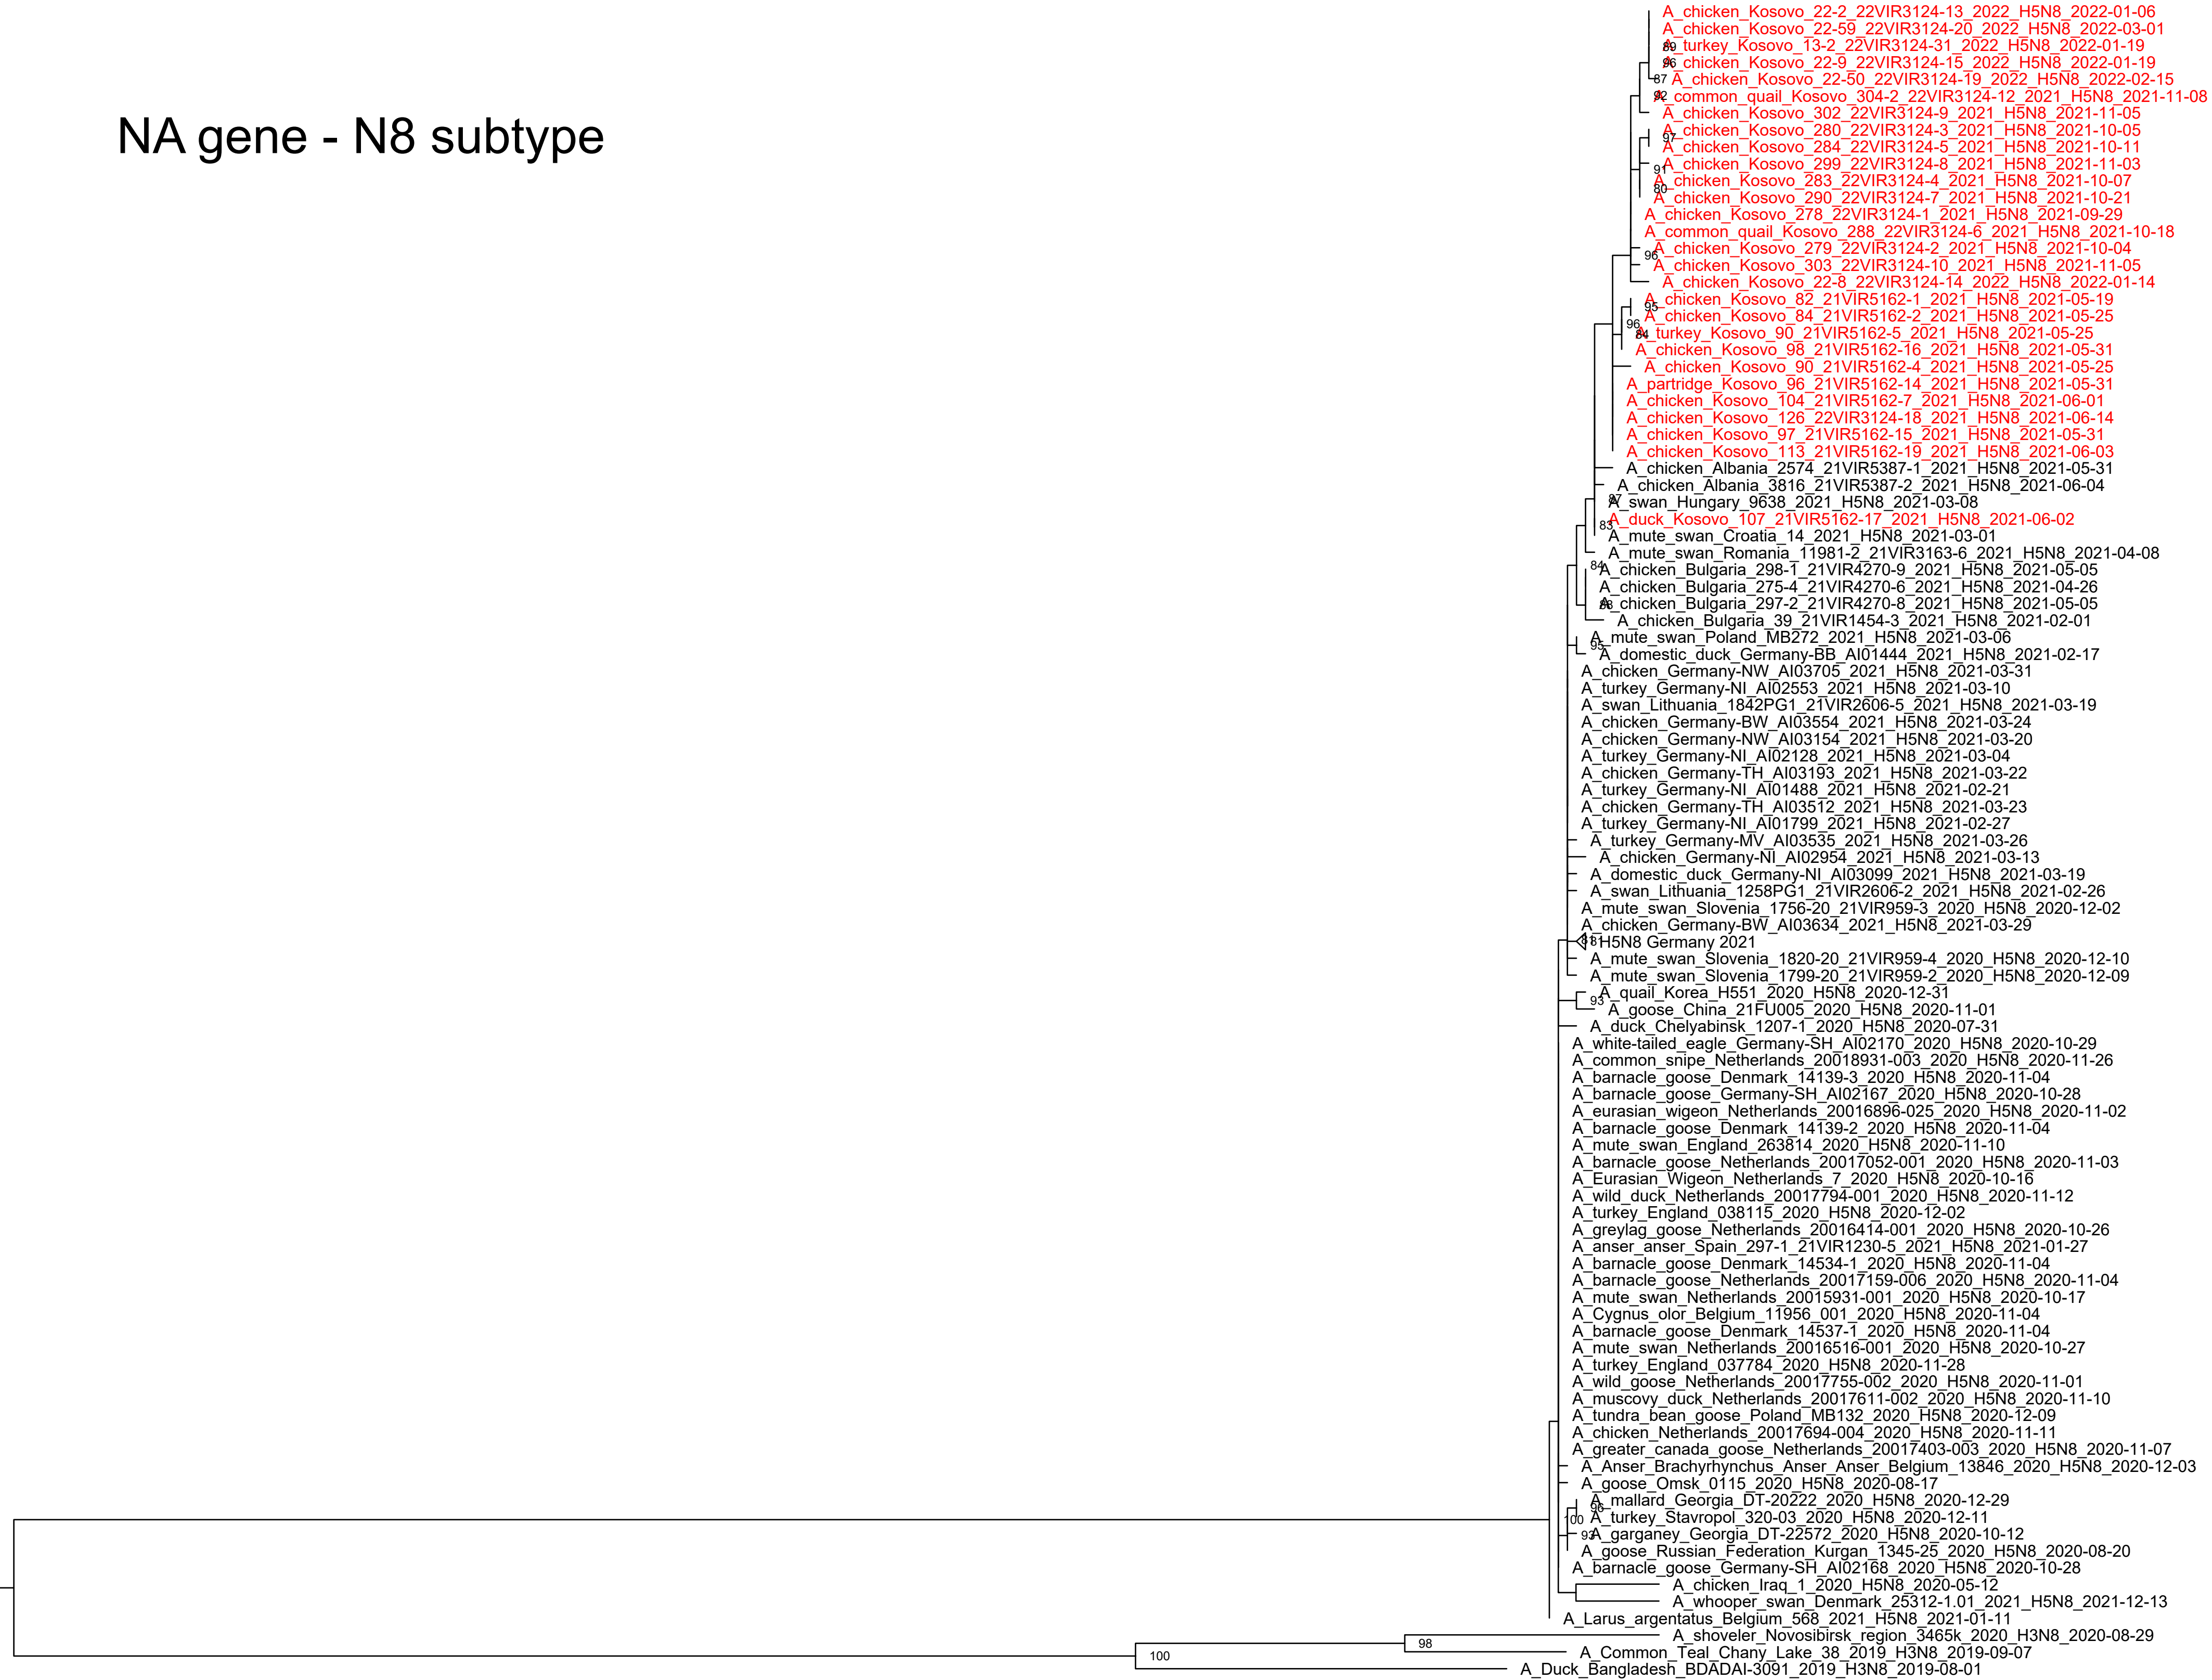

Supplement: s1 [file s1]

# PB1 gene

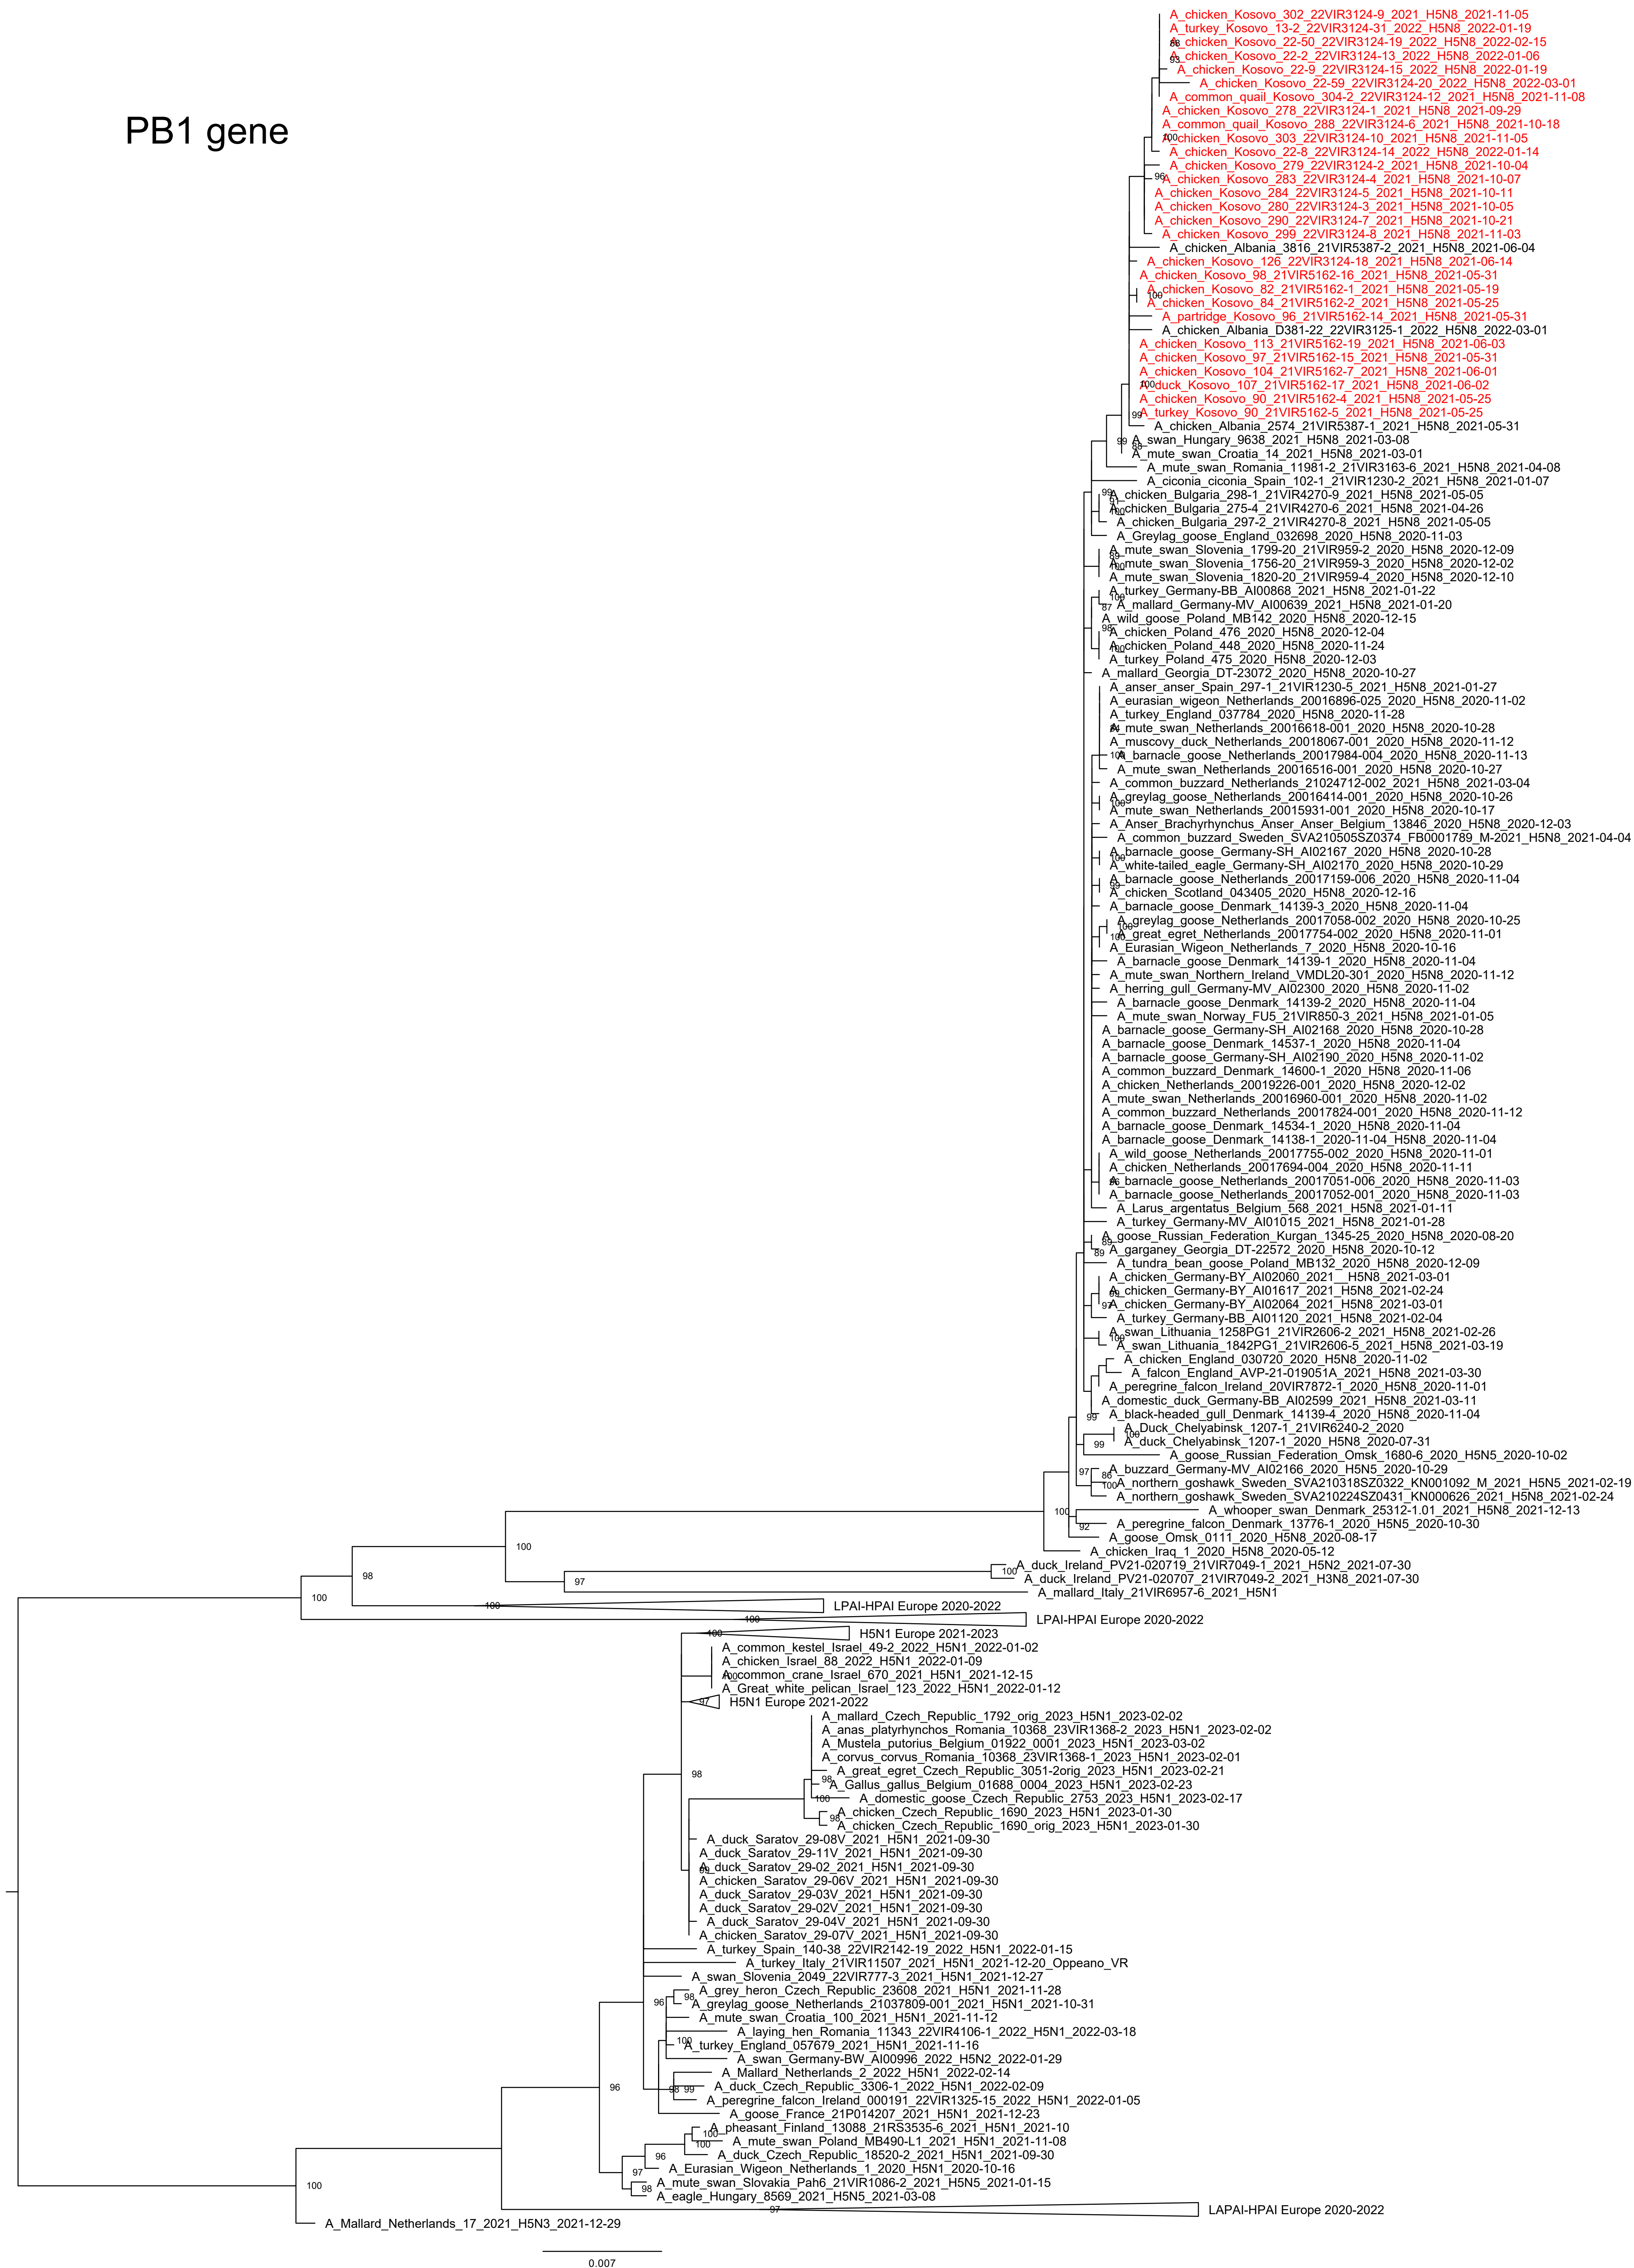

Supplement: s1 [file s1]
